1 **Title: A vibrating mesh nebulizer as an alternative to the Collison 3-jet nebulizer for**  
2 **infectious disease aerobiology.**

3

4 Jennifer D. Bowling<sup>a</sup>, Katherine J. O' Malley<sup>a</sup>, William B. Klimstra<sup>a</sup>, Amy L. Hartman<sup>a</sup>, and  
5 Douglas S. Reed<sup>a#</sup>

6

7 <sup>a</sup> Center for Vaccine Research, University of Pittsburgh, Pennsylvania, USA

8 <sup>b</sup> Department of Immunology, University of Pittsburgh, Pennsylvania, USA

9 <sup>c</sup> Department of Infectious Diseases and Microbiology, University of Pittsburgh, Pennsylvania,  
10 USA

11

12 <sup>#</sup> Address correspondence to Douglas S. Reed, dsreed@pitt.edu

13

14 Running Head: Vibrating mesh nebulizer for infectious disease aerobiology

15

16

17 **Abstract**

18 Experimental infection of animals via inhalation containing pathogenic agents is essential to  
19 understanding the natural history and pathogenesis of infectious disease as well as evaluation of  
20 potential medical countermeasures. We evaluated whether the Aeroneb, a vibrating mesh  
21 nebulizer, would serve as an alternative to the Collison, the ‘gold standard’ for generating  
22 infectious bioaerosols. While the Collison possesses desirable properties that have contributed to  
23 its longevity in infectious disease aerobiology, concerns have lingered about the volume and  
24 concentration of agent required to cause disease and the damage that jet nebulization causes to  
25 the agent. For viruses, the ratio of aerosol concentration to nebulizer concentration (spray factor,  
26 SF), the Aeroneb was superior to the Collison for four different viruses in a nonhuman primate  
27 head-only exposure chamber. Aerosol concentration of influenza was higher relative to  
28 fluorescein for the Aeroneb compared to the Collison, suggesting that the Aeroneb was less  
29 harsh to viral pathogens than the Collison when generating aerosols. The Aeroneb did not  
30 improve the aerosol SF for a vegetative bacterium, *Francisella tularensis*. Environmental  
31 parameters collected during the aerosols indicated that the Aeroneb generated a higher relative  
32 humidity in exposure chambers while not affecting other environmental parameters. Aerosol  
33 mass median aerodynamic diameter was generally larger and more disperse for aerosols  
34 generated by the Aeroneb than what is seen with the Collison but  $\geq 80\%$  were within the range  
35 that would reach the lower respiratory tract and alveolar regions. These data suggest that for viral  
36 pathogens, the Aeroneb is a suitable alternative to the Collison 3-jet nebulizer.

37 **Importance**

38 The threat of aerosolization is often not the natural method of transmission. While selection of  
39 an appropriate animal model is vital for these types of experiments, other confounding factors

40 can be controlled through a thorough understanding of experimental design and the effects that  
41 different parameters can have on disease outcome. Route of administration, particle size, and  
42 dose are all factors which can affect disease progression and need to be controlled. Aerosol  
43 research methods and equipment need to be well characterized to optimize the development of  
44 animal models for bioterrorism agents.  
45

## 46 **Introduction**

47

48 Experimental infection of animals with aerosolized pathogens to study pathogenesis or  
49 evaluate medical countermeasures remains a complicated procedure that requires expert training  
50 and highly sophisticated equipment. Environmental and situational factors can affect the  
51 survival, dose, site of deposition, and virulence of pathogenic agents (1-4). For example, studies  
52 have shown that relative humidity inside the chamber can alter aerosolization of bacteria and  
53 viruses (3, 5-7). Particle size can affect where a pathogen lands in the respiratory tract, which can  
54 have dramatic effects on pathogenesis and virulence (1, 2, 4, 8, 9). Therefore, to achieve  
55 reproducible dosing between experiments, one must fully characterize and validate all  
56 parameters of an aerosol exposure.

57 The Collison 3-jet nebulizer is a commonly employed aerosol generator in infectious  
58 disease aerobiology research (Fig. 1A). The nebulizer utilizes Bernoulli's principle to shear a  
59 liquid suspension into aerosolized particles, which impact against a hard surface (the interior of  
60 the jar) to further break apart particles (10). A primary reason for the appeal of the Collison  
61 nebulizer is that it generates high concentrations of particles that are relatively monodisperse  
62 with a mass median aerodynamic diameter between 1-2  $\mu\text{m}$  (11). This particle size can reach the  
63 alveolar regions of the lung. However, some studies suggest the shear forces, impaction, and  
64 recirculation of the infectious sample can damage organisms, potentially reducing pathogen  
65 viability or infectivity (12, 13). Damaged bacteria or viruses may also stimulate immune  
66 responses that protect the host. These effects could raise the dose required to cause disease,  
67 thereby requiring large quantities of pathogens grown to high titers for aerosol experiments.  
68 While the process of aerosolization will always place mechanical stress on infectious agents,  
69 aerosol generators that are 'gentler' than the Collison would be desirable.

70           The Aerogen Solo (a.k.a Aeroneb) is a single-use nebulizer employed in clinical settings  
71 for the delivery of aerosolized medication. The Aeroneb utilizes a palladium mesh perforated  
72 with conical shaped holes that act as a micropump when vibrated rather than high velocity air  
73 flow (14). We hypothesized that the Aeroneb might be gentler on pathogens than the Collison,  
74 potentially leading to improved aerosol performance. In this report, we report our efforts to  
75 characterize the aerosol performance of the Aeroneb as compared to the Collison for  
76 representative bacterial (*Francisella tularensis*) and viral pathogens (influenza).

77

78

79

## 80 **Results**

### 81 Aerosolization of viruses

82 Experimental aerosolization of pathogenic agents is commonly evaluated by  
83 determination of the spray factor (SF), which is calculated as the ratio of the aerosol  
84 concentration to the starting concentration. This allows one to compare between different  
85 aerosols to evaluate the impact of aerosol generators, sampling devices, and environmental  
86 parameters. A less commonly used alternative is aerosol efficiency (AE) that compares the  
87 amount of agent aerosolized to what is recovered from aerosol sampling devices. Prior to  
88 comparing nebulizers, we first sought to determine whether there was a difference in aerosol  
89 performance of H3N2 and H1N1 influenza viruses in the ferret whole-body (FWB) and rodent  
90 whole-body (RWB) chambers with the Collison nebulizer (Figure 2). No significant differences  
91 were seen between the SF of H1N1 and H3N2, regardless of the chamber used. Influenza spray  
92 factors (SFs) were slightly higher in the RWB compared to the FWB but this difference was also  
93 not statistically significant. The H1N1 data included aerosols with A/Ca/4/09 or A/PR/8/34; no  
94 significant differences existed between the two isolates based on a two-sided Mann-Whitney test  
95 ( $p = 0.0901$ ). In other experiments using other chambers and nebulizers, no differences in SF  
96 were seen based on the choice of influenza subtype, strain, or method of propagation (eggs or  
97 cell culture); the results in Table 1 and Figure 3 show combined results for all influenza viruses.

98 Comparison of aerosol performance of influenza strains between the Collison and  
99 Aeroneb was assessed in the rodent nose-only tower (NOT), the FWB chamber, and the NHP  
100 HO chamber. In the NOT, the SF for influenza was higher with the Collison and this difference  
101 was significant ( $p = 0.0145$ ) (Table 1, Figure 3A). The range of influenza SF generated by the  
102 Aeroneb in the NOT was also substantially broader than was seen with other nebulizer/chamber

103 combinations (coefficient of variation = 2.09). Fluorescein was added as a control to measure  
104 impact of the two nebulizers on pathogen viability. For both the Collison and Aeroneb in the  
105 NOT, there was little or no loss when comparing influenza SF to fluorescein SF. In contrast, in  
106 both the FWB and NHP HO chambers the Aeroneb outperformed the Collison as measured by  
107 SF and AE ( $p < 0.0001$ ) (Table 1). Further, there was a significant decrease in SF between the  
108 fluorescein salt and influenza with the Collison in both the FWB and NHP HO chambers  
109 ( $p < 0.0001$  for both) (Figure 3B-C). This drop was not seen with the Aeroneb, suggesting there is  
110 considerable loss of viable influenza in aerosols generated by Collison but not the Aeroneb in  
111 these chambers.

112 To evaluate whether these results were specific to influenza viruses, we also generated  
113 aerosols of RVFV into a RWB chamber and compared results obtained with the Aeroneb to prior  
114 data obtained with the Collison. As shown in Figure 4A, the Aeroneb did generate a higher SF of  
115 RVFV and the improvement was statistically significant ( $p < 0.0001$ ). For the encephalitic  
116 alphaviruses, the Aeroneb was used to generate aerosols in an NHP HO chamber (Figure 4B).  
117 For all three viruses, using the Aeroneb generated a SF that was a  $\frac{1}{2}$ -1  $\log_{10}$  improvement in SF  
118 over similar results obtained previously with the Collison (*D.S. Reed, personal observation*),  
119 however those results with the Collison were obtained with different virus isolates with some  
120 differences in viral plaque assays and media so the results are not directly comparable.

#### 121 Aerosolization of vegetative gram-negative bacteria

122 After demonstrating the dramatic improvement in SF for viral pathogens with the  
123 Aeroneb, we sought to determine whether similar improvements would be seen with a vegetative  
124 bacterium. We had previously shown no difference in SF between attenuated (LVS, the live  
125 vaccine strain) and virulent (SCHU S4) strains of *F. tularensis* (Faith et al, 2012). In those

126 studies, we also found that the broth media used to propagate *F. tularensis* greatly impacted SF,  
127 as did the relative humidity in the chamber. Aerosol performance of Brain-Heart Infusion (BHI)-  
128 grown LVS with the Aeroneb and Collison was assessed in the NOT and the RWB chambers  
129 without supplemental humidification. In the NOT, the Collison generated a better SF and higher  
130 AE for LVS than did the Aeroneb; this difference was significant ( $p < 0.0001$ ) (Table 2, Figure  
131 5). In contrast, in the RWB chamber, the Aeroneb had a slightly better SF than the Collison  
132 which also was significant ( $p = 0.0004$ ). AE was also higher for the Aeroneb than the Collison in  
133 the RWB. When comparing LVS SF to fluorescein SF in the NOT, we saw a significant, 2 to 3  
134  $\log_{10}$  decrease in the SF of LVS with both the Collison and the Aeroneb ( $p = 0.0079, 0.0006$ ,  
135 respectively) (Figure 5A). An even more substantial decrease in the LVS SF compared to the  
136 fluorescein SF was seen in the RWB chamber for both nebulizers ( $p < 0.0001$  for both) (Figure  
137 5B). This would suggest both nebulizers cause considerable loss of viable LVS although the  
138 impact is less in the NOT. This is likely due to the high relative humidity (RH) achieved in the  
139 NOT. The higher RH generated by the Aeroneb in the RWB could also explain the superior LVS  
140 SF obtained with the Aeroneb in that chamber, as we have previously seen that raising RH above  
141 60% improves LVS SF substantially (3).

#### 142 Particle sizes generated by the Collison and Aeroneb

143 The Collison has been shown to generate a small (1-2  $\mu\text{m}$  MMAD) particle that is  
144 relatively monodisperse. These particles would reach the lower respiratory tract, including the  
145 alveolar regions. The information from the manufacturer of the Aeroneb indicates it would  
146 generate a somewhat larger particle (average 3.1  $\mu\text{m}$ ) which should also reach the alveolar  
147 regions. Using an APS 3321, we evaluated particle sizes generated by the Collison and Aeroneb  
148 in the different chambers. Initially, we used small (400 or 900 nm) microspheres, however, the



149 Aeroneb was not able to generate good, consistent aerosols with these microspheres. We believe  
150 that this difficulty was a result of the microspheres clumping and not being able to readily pass  
151 through the vibrating mesh, however, mild sonication did not measurably improve the results  
152 (data not shown). If larger particles cannot readily pass through the vibrating mesh, this may  
153 contribute to the lower SF obtained with LVS with the Aeroneb. For this reason, we used  
154 fluorescein instead of microspheres to measure particle size. The results are shown in Table 3.  
155 Particle sizes obtained for the Collison were larger than expected, which we believe may be due  
156 to higher surface tension in the aerosolized particles caused by the fluorescein salt. What table 3  
157 does show though is that except for the NOT, the Aeroneb consistently generated larger particles  
158 than the Collison and with a broader distribution (as measured by GSD) in all of the chambers  
159 tested. The Aeroneb also generated a higher humidity in each chamber tested except for the  
160 NOT, which would at least partly explain the differences in particle size seen. Even with the  
161 larger particle sizes obtained with the Aeroneb using fluorescein, between 70-80% of the  
162 particles measured were  $\leq 5 \mu\text{m}$  MMAD. The only nebulizer/chamber combination to achieve  
163 less than 70% was the Collison in the NOT, which only had 55.97% of particles  $\leq 5 \mu\text{m}$ . This  
164 larger particle size is likely a result of the higher humidification achieved in the NOT by the  
165 Collison.

## 166 **Discussion**

167           Aerosol performance can be affected by a variety of different factors, from pre-  
168 aerosolization factors, such as pathogen growth conditions, to post-processing factors, such as  
169 concentration determination (3, 15). Thus, prior to beginning aerosol studies with animal  
170 models, it is important to characterize and understand the impact of aerosol equipment selection,  
171 pathogen handling techniques, and environmental parameters on the reproducibility of a research  
172 design. The Collison 3-jet nebulizer has long been used as the “gold standard” for infectious  
173 disease aerobiology studies because of its ease of use and relatively monodisperse particle size  
174 that can reach the deep lung of rodents, ferrets, rabbits and nonhuman primates. However, the  
175 method by which aerosols are generated by the Collison have been considered ‘harsh’ and could  
176 damage microorganisms, impacting the dose required to cause infection/disease and the host  
177 response to infection (12). The Collison also requires a relatively high volume of challenge  
178 material (10 ml), which can be difficult to generate depending on the agent and nebulizer  
179 concentration needed to achieve a desired challenge dose. These deficiencies can be a substantial  
180 impediment to aerosol studies, particularly for pathogens that require a high challenge dose to  
181 achieve infection/disease (e.g., alphaviruses in macaques). Alternative nebulizers that generate  
182 small particles that would penetrate to the deep lung ( $\leq 5 \mu\text{m}$ ), are less harsh on the  
183 microorganism being aerosolized, and require less challenge material to achieve comparable or  
184 higher doses would be desirable.

185           In agreement with what we have reported previously for *F. tularensis* and RVFV, the  
186 choice of exposure chamber impacts aerosol performance with smaller chambers (by total  
187 volume) typically producing a better SF than a larger chamber. The data we report here also  
188 demonstrate that while the choice of nebulizer does affect SF, the impact is dependent upon the

189 chamber used. In the NOT, the Aeroneb did not improve SF compared to the Collison for either  
190 LVS or influenza. Yet in the RWB, FWB, and NHP HO chambers, the Aeroneb dramatically  
191 improved SF performance compared to the Collison for influenza and other viral pathogens but  
192 had minimal impact on the SF for LVS. Particle sizes generated by the Aeroneb were generally  
193 larger than those generated by the Collison, except in the NOT, but 70-80% of the particles  
194 generated by the Aeroneb were in the ‘respirable’ range ( $\leq 5 \mu\text{m}$  MMAD) that would reach the  
195 deep lungs. Humidity levels were generally higher with the Aeroneb compared to the Collison,  
196 except in the NOT, which may explain the differences seen in SF and particle sizes with the  
197 Aeroneb in the other chambers.

198 Another important difference to note between the Collison and the Aeroneb is the volume  
199 needed for aerosolization and total volume aerosolized. The Collison requires 10 ml of sample  
200 for aerosol generation, while the Aeroneb requires 5-6 ml for a 10-minute aerosol. On average,  
201 the Collison aerosolized 3ml of sample while the Aeroneb aerosolized 4ml of sample during that  
202 10-minute aerosol. Additional challenge material could be added to the Aeroneb for aerosol  
203 exposures longer than 10 minutes; while technically feasible for the Collison, this would not be  
204 easily done. For each generator/exposure chamber setup, aerosol efficiency correlated with the  
205 SF, indicating that the improvement in SF for the Aeroneb compared to the Collison in the RWB,  
206 FWB and NHP HO chambers was not due to the increased volume of material aerosolized by the  
207 Aeroneb.

208 Prior studies have suggested the Collison may damage pathogens during the process of  
209 aerosolization through mechanical and shear forces (12). Fluorescein salt was used in some  
210 experiments to act as a surrogate for microorganisms to determine the ideal SF of each aerosol  
211 generator given loss within the system. The small size and lack of a membrane ensures the

212 fluorescein salt will not be damaged by the aerosolization process, and thus the loss of  
213 fluorescein salt during aerosolization can be attributed to leaks in the exposure system and  
214 adhesion of aerosol particles to equipment. Any additional decrease in SF of pathogens  
215 compared to the SF for fluorescein following aerosolization is likely due to loss of viability in  
216 the organism. The vegetative LVS bacteria had a significant drop in SF relative to fluorescein  
217 salt (1-3 log<sub>10</sub>) in all the combinations of nebulizer and exposure chamber tested here. This was  
218 despite the relatively high RH generated by either nebulizer. Reflecting the apparent loss in  
219 bacterial viability, the AE was quite low for LVS using either nebulizer.

220           Influenza SF also dropped relative to fluorescein salt for the Collison in the FWB and  
221 NHP HO chamber but not in the NOT. Surprisingly, the SF for influenza aerosolized with the  
222 Aeroneb did not drop relative to fluorescein salt in any of the chambers tested. This data would  
223 suggest that for viral pathogens, the superior SF of the Aeroneb to the Collison may be at least  
224 partially due to improved aerosol viability. Relative humidity did not appear to substantially alter  
225 SF for influenza although the RH was high in all the nebulizer/chamber combinations tested.  
226 Additional data generated with RVFV and the encephalitic alphaviruses further confirmed the  
227 superior SF performance of the Aeroneb with viral pathogens. The data presented in this paper  
228 indicate the Aeroneb is a suitable alternative to the Collison for infectious disease aerobiology  
229 research, particularly for viral pathogens. This data has been successfully used in developing a  
230 macaque model for respiratory exposure to highly pathogenic avian influenza (16). Exploration  
231 of aerosol generators other than the Collison is recommended when evaluating new animal  
232 models for human respiratory infections.

233

## 234 **Materials and Methods**

235 *Animal Use:* Experiments described in this report that involved animals were approved by the  
236 University of Pittsburgh's IACUC. Research was conducted in compliance with the Animal  
237 Welfare Act Regulations and other Federal statutes relating to animals and experiments  
238 involving animals and adheres to the principles set forth in the Guide for Care and Use of  
239 Laboratory Animals, National Research Council, 1996. The University of Pittsburgh is  
240 accredited by the Association for the Assessment and Accreditation of Laboratory Animal Care  
241 (AAALAC).

242 *Biosafety:* All aerosol experiments for this study were performed in a class III biological safety  
243 cabinet within the dedicated Aerobiology Suite inside a Biosafety Level-3 (BSL-3) facility  
244 operated by the Center for Vaccine Research. For respiratory protection during H5N1,  
245 alphavirus, or Rift Valley Fever virus experiments, personnel wore powered air purifying  
246 respirators (PAPRs) while performing plaque assays within class II biosafety cabinets at BSL-3  
247 conditions, using Vesphene Ise (diluted 1:128, Steris Corporation) for disinfection. Spatial and  
248 temporal separation was maintained between H5N1, Rift Valley Fever, and all other infectious  
249 agents. Work with *F. tularensis* LVS strain and seasonal influenza was conducted at BSL2+  
250 conditions in a class II biosafety cabinet using 10% bleach or Vesphene Ise (1:128) for  
251 disinfection.

252 *Bacteria:* A frozen stock of Live Vaccine Strain (LVS) *F. tularensis* originally obtained from  
253 Jerry Nau and passaged a single time in culture were used for aerosol experiments. Prior to  
254 aerosol exposure, LVS was grown on Cysteine Heart Agar (CHA; BD Difco™ and BD BBL™,  
255 Becton Dickinson, La Jolla, CA) for two days at 37°C, 5% CO<sub>2</sub> and then overnight in Brain  
256 Heart Infusion (BHI) broth (BD BBL™) supplemented with 2.5% ferric pyrophosphate and

257 1.0% L-Cysteine hydrochloride as previously described (3). Cultures were incubated at 37°C in  
258 an orbital shaker at 200rpm and harvested between 15 to 18 hours to ensure the bacteria were in  
259 the logarithmic growth phase. The O.D. of the culture was read and bacterial concentration  
260 estimated based on previously determined OD to CFU ratios (3). The concentration of LVS was  
261 confirmed by colony counts on CHA.

262 *Influenza*: Two H1N1 strains, A/PR/8/34 obtained from Rich Webby, and A/Ca/04/09 from the  
263 Biodefense and Emerging Infectious Resources were used in these experiments. An H3N2 virus  
264 (influenza A/Syd/5/37) obtained from Michael Murphy Corb and an H5N1 virus  
265 (A/Vietnam/1203/04) obtained from Daniel Perez were also used. The H1N1 and H3N2 viruses  
266 were propagated in MDCK cells and frozen at -80 until use. The H5N1 (A/Vietnam/1203/2004)  
267 stock was propagated in SPF chicken eggs and the stock frozen at -80 until use. Temporal and  
268 spatial separation of all strains of influenza was maintained throughout the experiments; H1N1  
269 and H3N2 viruses were used at BSL-2 while H5N1 was used at BSL-3. Prior to aerosol  
270 experiments, influenza viral stocks were diluted in viral growth media (Dulbecco's Modified  
271 Eagle's Medium, 2.5% of 7.5% bovine serum albumin fraction V, 1% penicillin/streptomycin,  
272 1% HEPES buffer, and 0.1% TPCK trypsin).

273 *Rift Valley Fever virus (RVFV)*: The stock of RVFV (isolate ZH501) used in these experiments  
274 was derived from an infectious clone as previously described (17). Prior to aerosol experiments,  
275 it was thawed and diluted in DMEM containing 2% FBS, glycerol and Antifoam A for  
276 aerosolization as previously described.

277 *Alphaviruses*: Venezuelan equine encephalitis virus (VEEV; isolate INH9813), western equine  
278 encephalitis virus (WEEV; isolate Fleming), and eastern equine encephalitis virus (EEEV;

279 isolate V105) were derived from infectious clones of human isolates passaged a single time in  
280 BHK cells. Stocks were thawed and diluted in Optimem for aerosolization.

281 *TCID50*: confluent MDCK cells (ATCC CCL-34) were infected with tenfold serial dilutions of  
282 influenza samples in a 96-well plate. The plates were incubated at 37°C/5% CO<sub>2</sub> for 48 hours.  
283 Cells were then examined under a microscope for cytopathic effect (CPE) as compared to the  
284 uninfected MDCK cell controls. Each well was scored as positive or negative for CPE. Viral  
285 titers were then calculated using the method described by Reed and Muench.

286 *Plaque assay*: virus samples were adsorbed onto confluent monolayers of Vero, Vero E6, or  
287 MDCK cells in duplicate wells of a 6-well plate for one hour at 37°C/5% CO<sub>2</sub>. After incubation,  
288 inoculum was removed and cells were overlaid with a 1% nutrient overlay (2X Modified Eagle  
289 Medium, BSA, penicillin/streptomycin, 2% agarose). Plates were incubated at 37°C/5% CO<sub>2</sub> for  
290 up to 5 days, depending on virus. Cells were fixed with 37% formaldehyde, agar plugs were  
291 removed, and cells were stained with a 0.1% crystal violet stain to visualize plaques. Wells with  
292 15 to 100 plaques were counted for titer calculations. H5N1 plaque assays were performed in the  
293 same manner as seasonal influenza plaque assays with the following changes: following the  
294 addition of inoculum, the plates were incubated at 4°C for 10 minutes, then incubated at  
295 37°C/5% CO<sub>2</sub> for 50 minutes; a 0.9% nutrient overlay was used instead of a 1.0% nutrient  
296 overlay.

297 *Aerosol Exposures*: The AeroMP or Aero 3G aerosol management systems (Biaera  
298 Technologies, Hagerstown, MD) were used to control, monitor, and record aerosol parameters  
299 during aerosol experiments. Unless otherwise noted, aerosols were ten minutes in length. The  
300 airflow parameters of the aerosol experiments were programmed based on chamber volume in  
301 accordance with protocols used to infect animals. Air input (primary and secondary air) and

302 vacuum (exhaust and sampler) were set in balance at one-half of the chamber volume, to insure  
303 one complete air change in the exposure chamber every two minutes. Aerosols were generated  
304 using either a 3-jet Collison nebulizer or an Aeroneb nebulizer (see Figure 1). Airflow through  
305 the Collison was set at 7.5 lpm and 26-30 psi. The Aeroneb utilizes a vibrating mesh, not  
306 pressurized air, for generating aerosol particles. The Aeroneb was placed in line with the  
307 secondary/dilution air to push the air into the exposure chamber. Because exposure chamber  
308 structure and volume can influence aerosol performance (5), four exposure chambers were used  
309 for these experiments: the rodent nose-only tower (NOT), the rodent whole-body chamber  
310 (RWB), the ferret whole-body chamber (FWB), and the nonhuman primate head only chamber  
311 (NHP HO), with chamber volumes of 12L, 39L, 44L, and 32L respectively.

312 *Aerosol Sampling:* Bioaerosol sampling was performed using the all glass impinger (AGI; Ace  
313 Glass, Vineland, NJ) calibrated with the Gilibrator to ensure an airflow of  $6.0 \pm 0.25$  L/min. The  
314 AGI is attached to the side of the aerosol exposure chamber in an area close to the breathing  
315 zone. For LVS aerosols, 10ml of BHI broth and 40 $\mu$ l of antifoam A (Fluka, cat. #10794) was  
316 added to each AGI. For virus aerosols, 10ml of cell culture media and 80 $\mu$ l of antifoam was  
317 added to each AGI. For RVFV aerosols, glycerol was also added. For VEEV, WEEV, and EEEV  
318 aerosols, 1% FCS was also added to the culture media. Aerosol concentration was determined as  
319 previously described (3, 5).

320 *Aerosol Performance:* Aerosol performance between nebulizers was compared using SF and  
321 aerosol efficiency (AE). SF was determined as previously described (3, 5), the ratio of the  
322 aerosol concentration (determined from the AGI) to the starting concentration in the aerosol  
323 generator. AE is the ratio of the aerosol concentration to the theoretical maximum aerosol  
324 concentration as previously described (18). Aerosol particle size as measured by mass median



325 aerodynamic diameter (MMAD) and geometric square deviation (GSD) using an aerodynamic  
326 particle sizer (APS) model #3321 (TSI, Shoreview, MN).

327 *Fluorescein*: Fluorescein salt (Sigma) was added to some aerosol experiments to be used as an  
328 indicator of maximum SF given natural loss. Fluorescein salt was dissolved at a concentration of  
329 0.1mg in 1ml of ddH<sub>2</sub>O prior to addition to nebulizer contents. Initial studies were conducted  
330 (data not shown) to verify that addition of fluorescein did not alter pathogen viability or  
331 quantitation in culture, whether by plating on agar (*F. tularensis*) or TCID<sub>50</sub>/plaque assay  
332 (influenza).

333 *Statistical analysis*: GraphPad Prism® 6 was used to create all figures and to perform two-sided  
334 Mann-Whitney U tests to compare the SF and aerosol efficiency between nebulizers. This  
335 nonparametric test was chosen due to the non-normal distribution of results and the high  
336 frequency of outliers.

337

338 **References**

- 339 1. Fernstrom A, Goldblatt M. 2013. Aerobiology and its role in the transmission of  
340 infectious diseases. *Journal of pathogens* 2013.
- 341 2. Thomas R, Davies C, Nunez A, Hibbs S, Flick-Smith H, Eastaugh L, Smither S, Gates A,  
342 Oyston P, Atkins T. 2010. Influence of particle size on the pathology and efficacy of  
343 vaccination in a murine model of inhalational anthrax. *Journal of medical microbiology*  
344 59:1415-1427.
- 345 3. Faith S, Smith LK, Swatland A, Reed DS. 2012. Growth conditions and environmental  
346 factors impact aerosolization but not virulence of *Francisella tularensis* infection in mice.  
347 *Frontiers in cellular and infection microbiology* 2:126.
- 348 4. Saini D, Hopkins GW, Chen C-j, Seay SA, Click EM, Lee S, Hartings JM, Frothingham  
349 R. 2011. Sampling port for real-time analysis of bioaerosol in whole body exposure  
350 system for animal aerosol model development. *Journal of pharmacological and*  
351 *toxicological methods* 63:143-149.
- 352 5. Reed DS, Bethel LM, Powell DS, Caroline AL, Hartman AL. 2014. Differences in  
353 aerosolization of Rift Valley fever virus resulting from choice of inhalation exposure  
354 chamber: implications for animal challenge studies. *Pathogens and disease* 71:227-233.
- 355 6. Cox C, Goldberg L. 1972. Aerosol survival of *Pasteurella tularensis* and the influence of  
356 relative humidity. *Applied microbiology* 23:1-3.
- 357 7. Hood A. 1977. Virulence factors of *Francisella tularensis*. *Epidemiology and Infection*  
358 79:47-60.
- 359 8. Roy C, Reed D, Hutt J. 2010. Aerobiology and inhalation exposure to biological select  
360 agents and toxins. *Veterinary pathology* 47:779-789.

- 361 9. Lackemeyer MG, Kok-Mercado Fd, Wada J, Bollinger L, Kindrachuk J, Wahl-Jensen V,  
362 Kuhn JH, Jahrling PB. 2014. ABSL-4 aerobiology biosafety and technology at the  
363 NIH/NIAID integrated research facility at Fort Detrick. *Viruses* 6:137-150.
- 364 10. May K. 1973. The Collison nebulizer: description, performance and application. *Journal*  
365 *of Aerosol Science* 4:235-243.
- 366 11. Roy C, Pitt L. 2012. *Infectious disease aerobiology, Biodefense Research Methodology*  
367 *and Animal Models*, 2nd ed. Taylor & Francis Group.
- 368 12. Zhen H, Han T, Fennell DE, Mainelis G. 2014. A systematic comparison of four  
369 bioaerosol generators: Affect on culturability and cell membrane integrity when  
370 aerosolizing *Escherichia coli* bacteria. *Journal of Aerosol Science* 70:67-79.
- 371 13. Thomas RJ, Webber D, Hopkins R, Frost A, Laws T, Jayasekera PN, Atkins T. 2011. The  
372 cell membrane as a major site of damage during aerosolization of *Escherichia coli*.  
373 *Applied and environmental microbiology* 77:920-925.
- 374 14. Zhang G, David A, Wiedmann TS. 2007. Performance of the vibrating membrane aerosol  
375 generation device: aeroneb micropump nebulizer™. *Journal of Aerosol Medicine* 20:408-  
376 416.
- 377 15. Goodlow RJ, Leonard FA. 1961. Viability and infectivity of microorganisms in  
378 experimental airborne infection. *Bacteriological reviews* 25:182.
- 379 16. Wonderlich ER, Swan ZD, Bissel SJ, Hartman AL, Carney JP, O'Malley KJ, Obadan  
380 AO, Santos J, Walker R, Sturgeon TJ. 2017. Widespread virus replication in alveoli  
381 drives acute respiratory distress syndrome in aerosolized H5N1 influenza infection of  
382 macaques. *The Journal of Immunology*:1601770.

- 383 17. Bales JM, Powell DS, Bethel LM, Reed DS, Hartman ALJ. *Fic, microbiology* i. 2012.  
384 Choice of inbred rat strain impacts lethality and disease course after respiratory infection  
385 with Rift Valley Fever Virus. *2*:105.
- 386 18. Dabisch P, Yeager J, Kline J, Klindedinst K, Welsch A, Pitt ML. 2012. Comparison of the  
387 efficiency of sampling devices for aerosolized *Burkholderia pseudomallei*. *Inhalation*  
388 *toxicology* 24:247-254.
- 389
- 390

391 **Acknowledgements**

392 The research described herein was sponsored by the National Institute of Allergy & Infectious  
393 Diseases at the National Institutes of Health, grants R01 A102966-01A1 & R21 NS088326-01  
394 and the Defense Threat Reduction Agency Grant #W911QY-15-1-0019 and is sponsored by the  
395 Department of the Army, U.S. Army Contracting Command, Aberdeen Proving Ground, Natick  
396 Contracting Division, Ft. Detrick Maryland. Any opinions, findings, and conclusions or  
397 recommendations expressed in this material are those of the author(s) and do not necessarily  
398 reflect the position or the policy of the Government and no official endorsement should be  
399 inferred. Special thanks to past and present members of the Hartman and Klimstra labs at the  
400 University of Pittsburgh, especially Stacey Barrick, Matthew Dunn, Dr. Christina Gardner,  
401 Theron Gilliland, Jr., Joe Albe, and Aaron Walters.

402 **Legends**

403 **Figure 1. Collison and Aeroneb aerosol generators.** The Collison nebulizer by CH technology  
404 (left) utilizes Bernoulli's principle to create aerosols from a recirculated liquid sample. The  
405 Aeroneb by Aerogen (right) utilizes a vibrating palladium mesh membrane to create aerosols  
406 from a liquid sample.

407

408 **Figure 2. SF does not vary between influenza A strains or exposure chambers.** H3N2 and  
409 H1N1 influenza viruses were aerosolized using a Collison nebulizer into either a FWB or RWB  
410 exposure chamber. Graph shows SF for each combination of virus and exposure chambers.  
411 Values shown are individual aerosol runs along with the mean and standard deviation. None of  
412 the results were statistically significantly different from the others as determined by a t-test.

413

414 **Figure 3. Better aerosol performance using the Aeroneb with influenza viruses.** Graphs  
415 show the SF of fluorescein salt and influenza in the A) NOT, B) FWB, and C) NHP HO  
416 chambers using the Collison or the Aeroneb. Values shown are individual aerosol runs with  
417 mean and standard deviation. Black horizontal bars indicate results that are statistically different  
418 between fluorescein salt and influenza SF, determined using a t-test with Welch's correction,  
419 with the  $p$  value shown above the bar.

420

421 **Figure 4. Aerosol performance of the Aeroneb with other viral pathogens.** Graphs show the  
422 SF of A) RVFV with the Collison and the Aeroneb and B) encephalitic alphaviruses and H5N1  
423 using the Aeroneb. Values shown are individual aerosol runs with mean and standard deviation.  
424 Black horizontal bars indicate results that are statistically different between fluorescein salt and

425 influenza SF, determined using a t-test with Welch's correction, with the p value shown above  
426 the bar.

427

428 **Figure 5. The Collison resulted in better aerosol performance than the Aeronob.** Shown is  
429 the SF of fluorescein salt and LVS in the A) NOT and B) RWB using the Collison or the  
430 Aeronob. Values shown are individual aerosol runs with mean and standard deviation. Black  
431 horizontal bars indicate results that are statistically different between fluorescein salt and  
432 influenza SF, determined using a t-test with Welch's correction, with the p value shown above  
433 the bar.

434

435

436

437

| <b>Chamber</b> | <b>Aerosol Generator</b> | <b>Median Fluorescence SF</b> | <b>Median Influenza SF</b> | <b>Log Reduction</b> | <b>Median Influenza AE</b> | <b>Average RH (%)</b> |
|----------------|--------------------------|-------------------------------|----------------------------|----------------------|----------------------------|-----------------------|
| <b>NOT</b>     | <b>Collison</b>          | <b>3.44E-06</b>               | <b>4.34E-06</b>            | <b>-0.10</b>         | <b>13.87%</b>              | <b>85.83</b>          |
|                | <b>Aeroneb</b>           | <b>2.68E-06</b>               | <b>1.18E-06</b>            | <b>0.36</b>          | <b>2.10%</b>               | <b>87.22</b>          |
| <b>FWB</b>     | <b>Collison</b>          | <b>6.35E-06</b>               | <b>1.20E-06</b>            | <b>0.72</b>          | <b>6.84%</b>               | <b>61.21</b>          |
|                | <b>Aeroneb</b>           | <b>6.73E-06</b>               | <b>5.80E-06</b>            | <b>0.06</b>          | <b>31.91%</b>              | <b>66.64</b>          |
| <b>NHP HP</b>  | <b>Collison</b>          | <b>5.07E-06</b>               | <b>1.13E-06</b>            | <b>0.65</b>          | <b>5.35%</b>               | <b>81.15</b>          |
|                | <b>Aeroneb</b>           | <b>9.97E-06</b>               | <b>7.52E-06</b>            | <b>0.12</b>          | <b>32.27%</b>              | <b>97.95</b>          |

438 **Table 1. Aerosol performance of influenza strains using the Collison and Aeroneb in**  
439 **different exposure chambers.** Shown is the SF of fluorescein salt (the comparator), the SF of  
440 influenza, the log reduction in SF between fluorescein and influenza, and aerosol efficiency.  
441 Average relative humidity is included to show differences in SF are most likely not due to this  
442 factor.  
443  
444



| <b>Chamber</b> | <b>Aerosol Generator</b> | <b>Median Fluorescence SF</b> | <b>Median Influenza SF</b> | <b>Log Reduction</b> | <b>Median Influenza AE</b> | <b>Average RH (%)</b> |
|----------------|--------------------------|-------------------------------|----------------------------|----------------------|----------------------------|-----------------------|
| <b>NOT</b>     | <b>Collison</b>          | <b>1.50E-05</b>               | <b>5.4E-07</b>             | <b>1.44</b>          | <b>1.598%</b>              | <b>82.56</b>          |
|                | <b>Aeroneb</b>           | <b>7.08E-06</b>               | <b>1.01E-08</b>            | <b>2.85</b>          | <b>0.035%</b>              | <b>78.81</b>          |
| <b>RWB</b>     | <b>Collison</b>          | <b>8.14E-06</b>               | <b>2.01E-09</b>            | <b>3.61</b>          | <b>0.012%</b>              | <b>58.33</b>          |
|                | <b>Aeroneb</b>           | <b>9.74E-06</b>               | <b>8.12E-09</b>            | <b>3.08</b>          | <b>0.108%</b>              | <b>69.21</b>          |

445 **Table 2. Aerosol performance of LVS strains using the Collison and Aeroneb in different**  
446 **exposure chambers.** Shown is the SF of fluorescein salt (the comparator), the SF of LVS, the  
447 log reduction in SF between fluorescein and LVS, and aerosol efficiency for the different  
448 generator and exposure chambers tested. Average relative humidity is included to show  
449 differences in SF are most likely not due to this factor.

450

451

| Chamber    | Nebulizer       | MMAD        | GSD         | CMAD        | % $\leq 3.5$<br>$\mu\text{m}$ | % $\leq 5$ $\mu\text{m}$ | A.H.           |
|------------|-----------------|-------------|-------------|-------------|-------------------------------|--------------------------|----------------|
| <b>NHP</b> | <b>Collison</b> | <b>3.05</b> | <b>3.67</b> | <b>0.67</b> | <b>60.00</b>                  | <b>84.06</b>             | <b>1018.05</b> |
|            | <b>Aeroneb</b>  | <b>3.93</b> | <b>2.37</b> | <b>0.67</b> | <b>44.84</b>                  | <b>71.57</b>             | <b>1256.05</b> |
| <b>RWB</b> | <b>Collison</b> | <b>2.96</b> | <b>2.84</b> | <b>0.65</b> | <b>64.07</b>                  | <b>89.11</b>             | <b>822.88</b>  |
|            | <b>Aeroneb</b>  | <b>3.05</b> | <b>4.53</b> | <b>0.58</b> | <b>60.59</b>                  | <b>84.88</b>             | <b>1039.48</b> |
| <b>NOT</b> | <b>Collison</b> | <b>5.05</b> | <b>1.54</b> | <b>0.63</b> | <b>27.47</b>                  | <b>55.97</b>             | <b>1360.18</b> |
|            | <b>Aeroneb</b>  | <b>3.05</b> | <b>2.94</b> | <b>0.58</b> | <b>59.03</b>                  | <b>80.89</b>             | <b>1302.00</b> |
| <b>FWB</b> | <b>Collison</b> | <b>2.21</b> | <b>3.41</b> | <b>0.63</b> | <b>70.34</b>                  | <b>86.55</b>             | <b>677.36</b>  |
|            | <b>Aeroneb</b>  | <b>3.28</b> | <b>2.36</b> | <b>0.67</b> | <b>54.86</b>                  | <b>74.46</b>             | <b>921.15</b>  |

452 **Table 3. Particle size generated using the Collison and Aeroneb to aerosolize fluorescein**  
453 **salt in different exposure chambers.** Shown is the mass mean aerodynamic diameter  
454 (MMAD), geometric standard deviation (GSD), count median aerodynamic diameter (CMAD),  
455 and percentage of particles less than or equal to 3.5 and 5  $\mu\text{m}$  in size, and absolute humidity  
456 (A.H.) in the exposure chamber, in  $\text{g}/\text{m}^3$ .

457

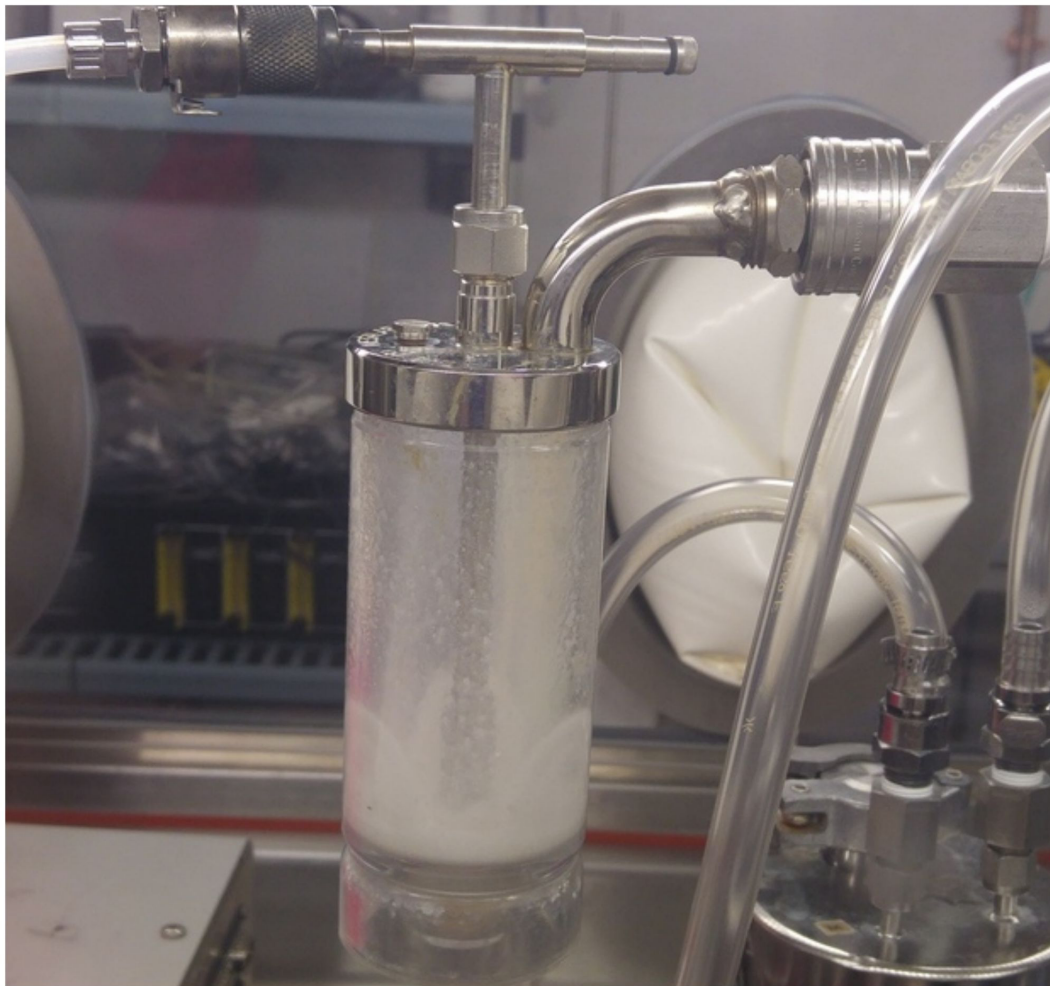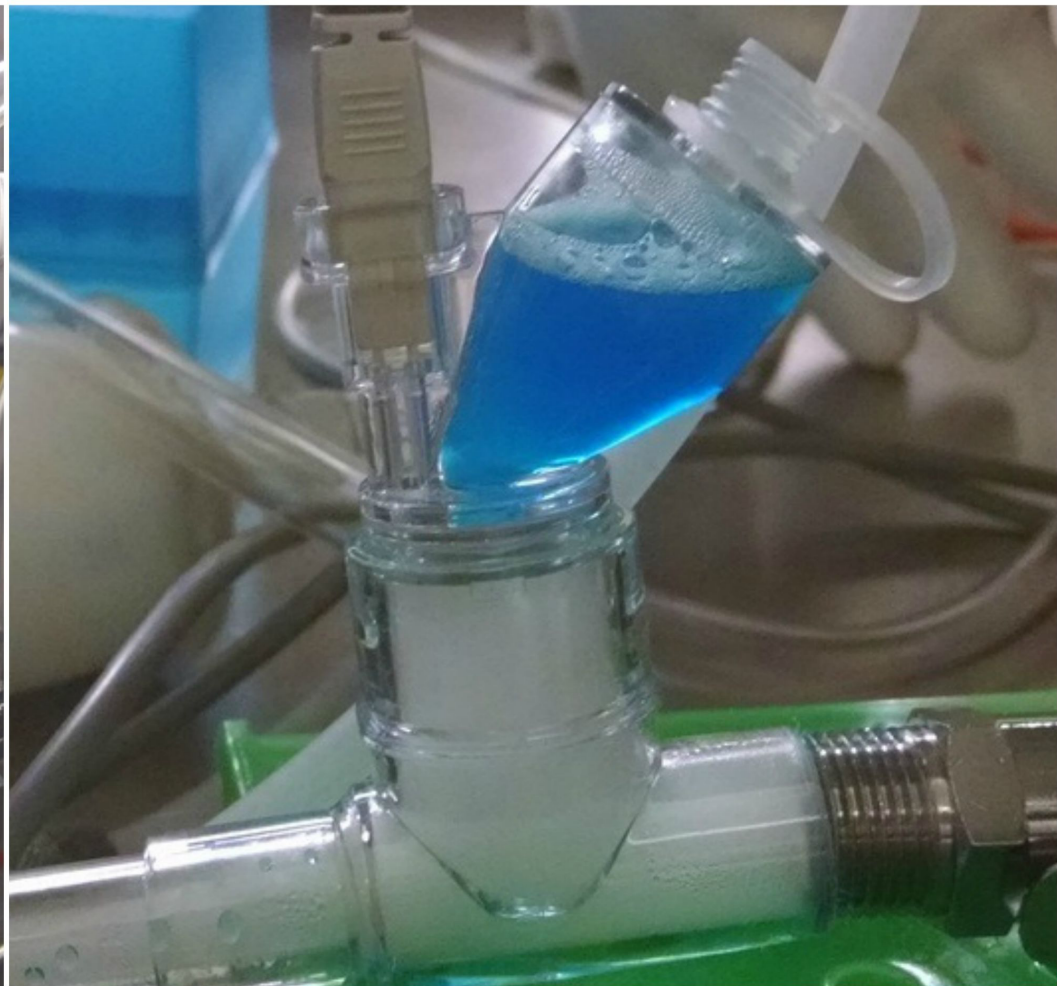

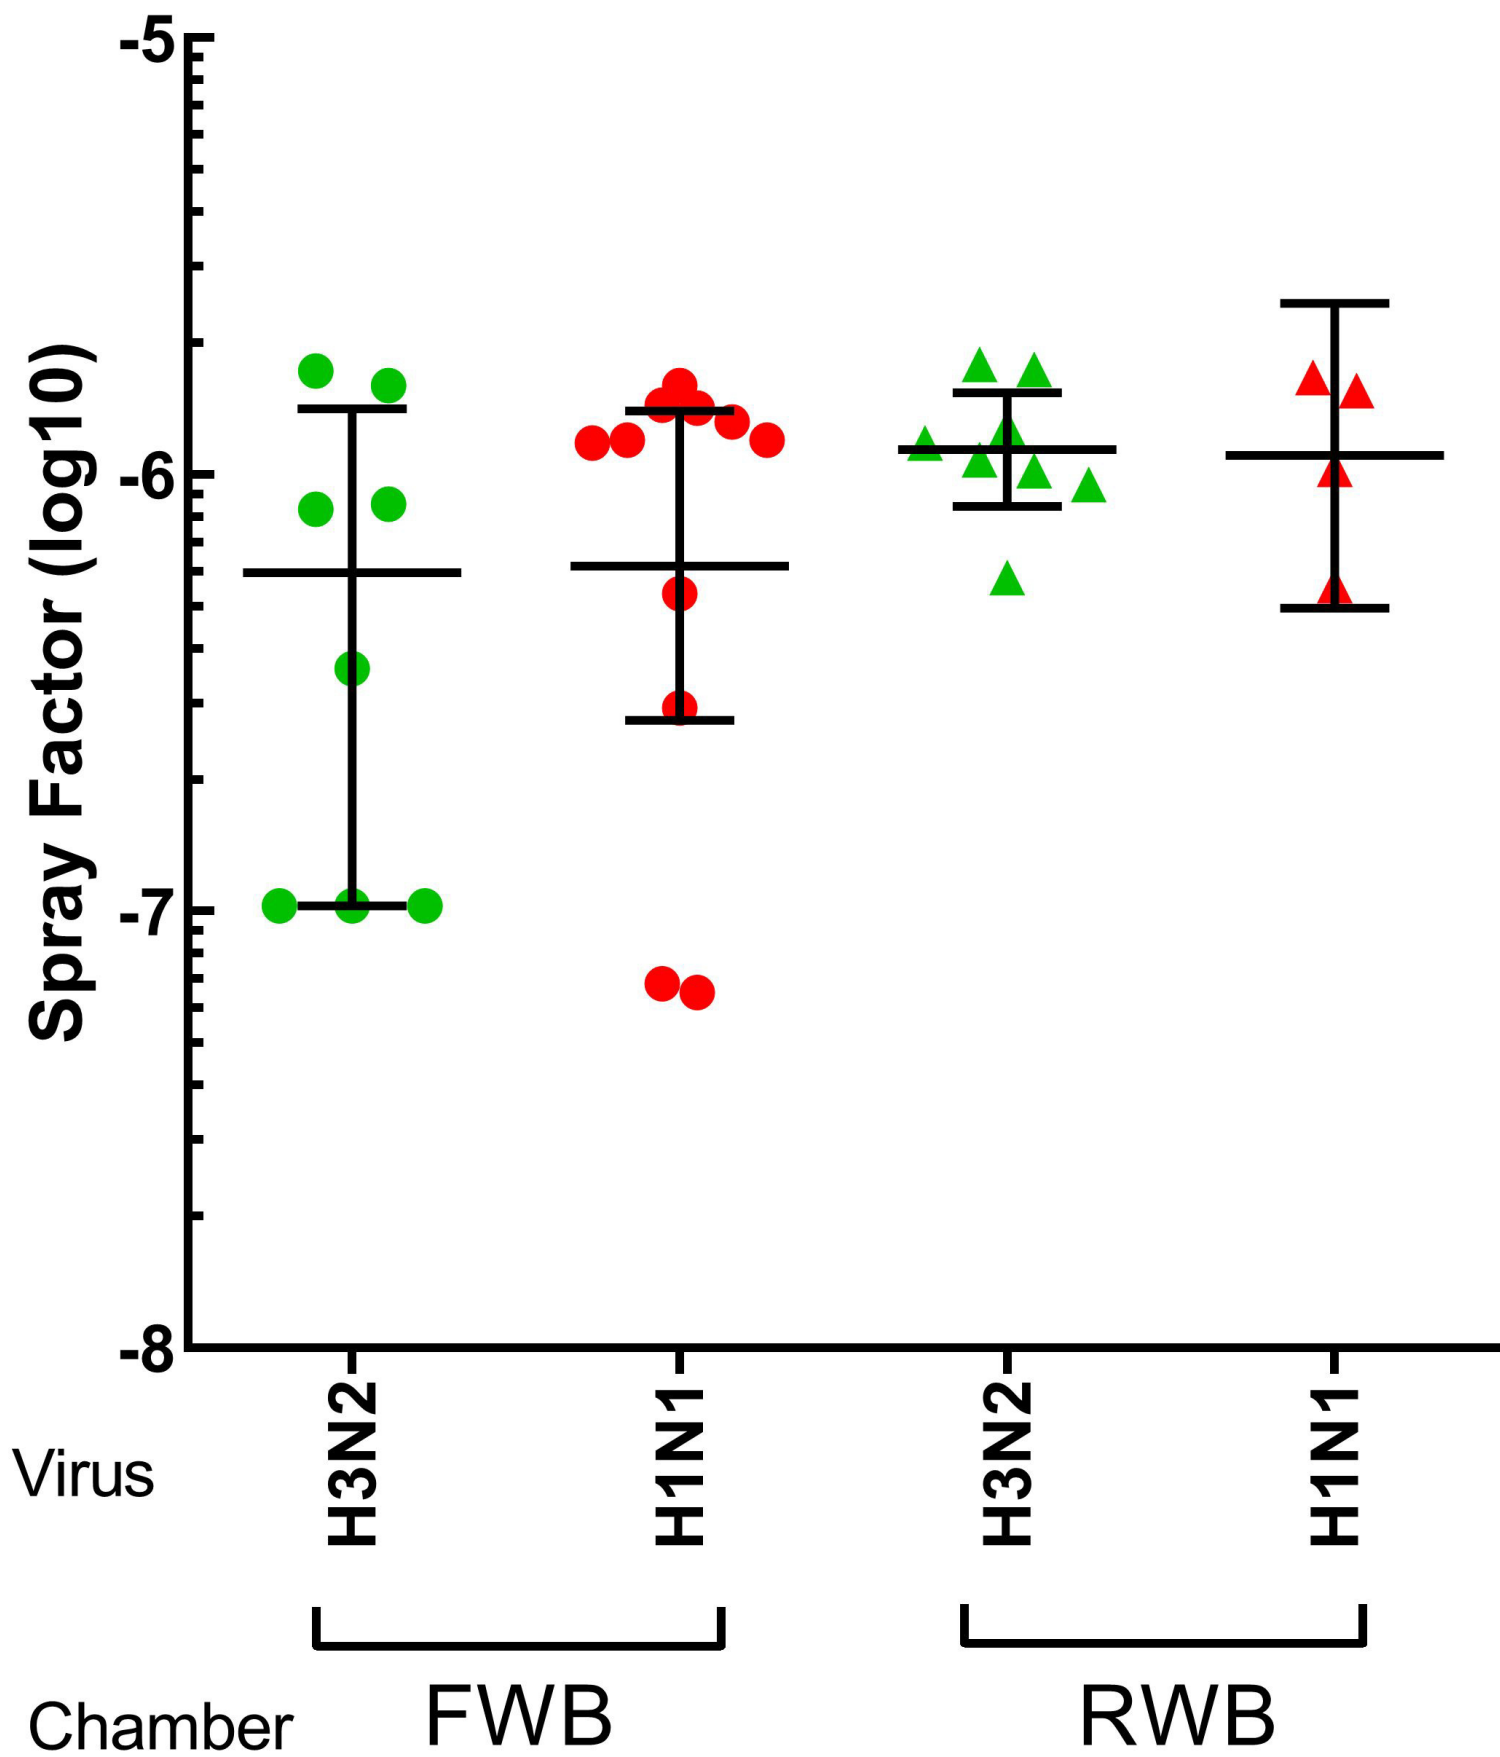

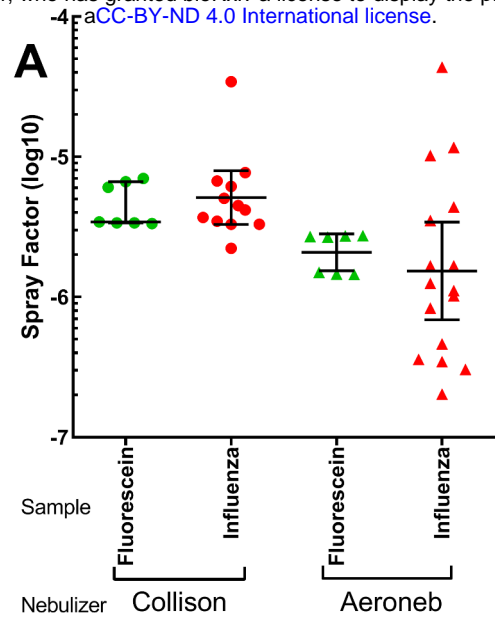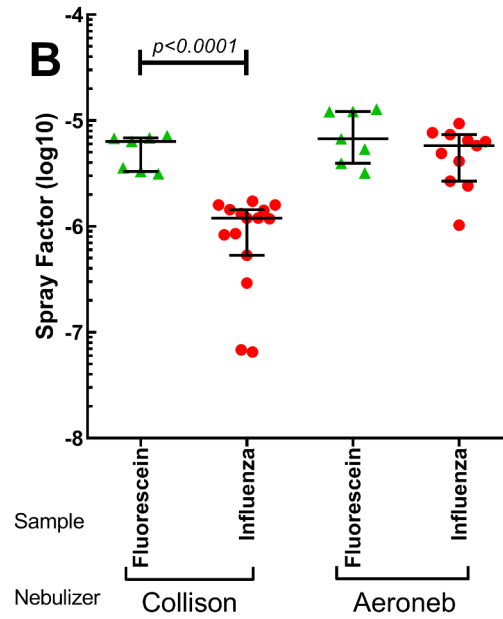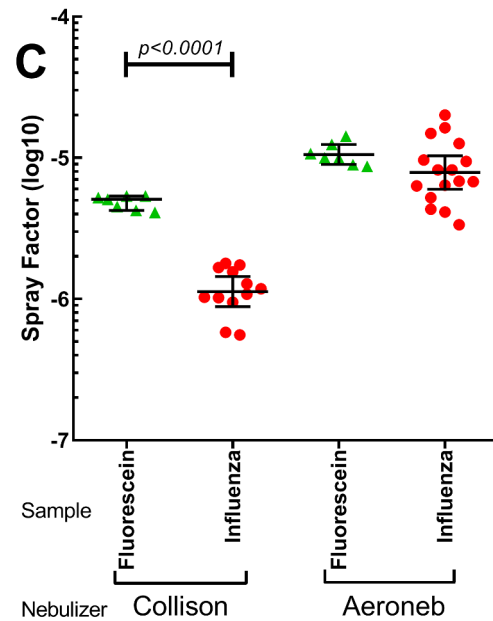

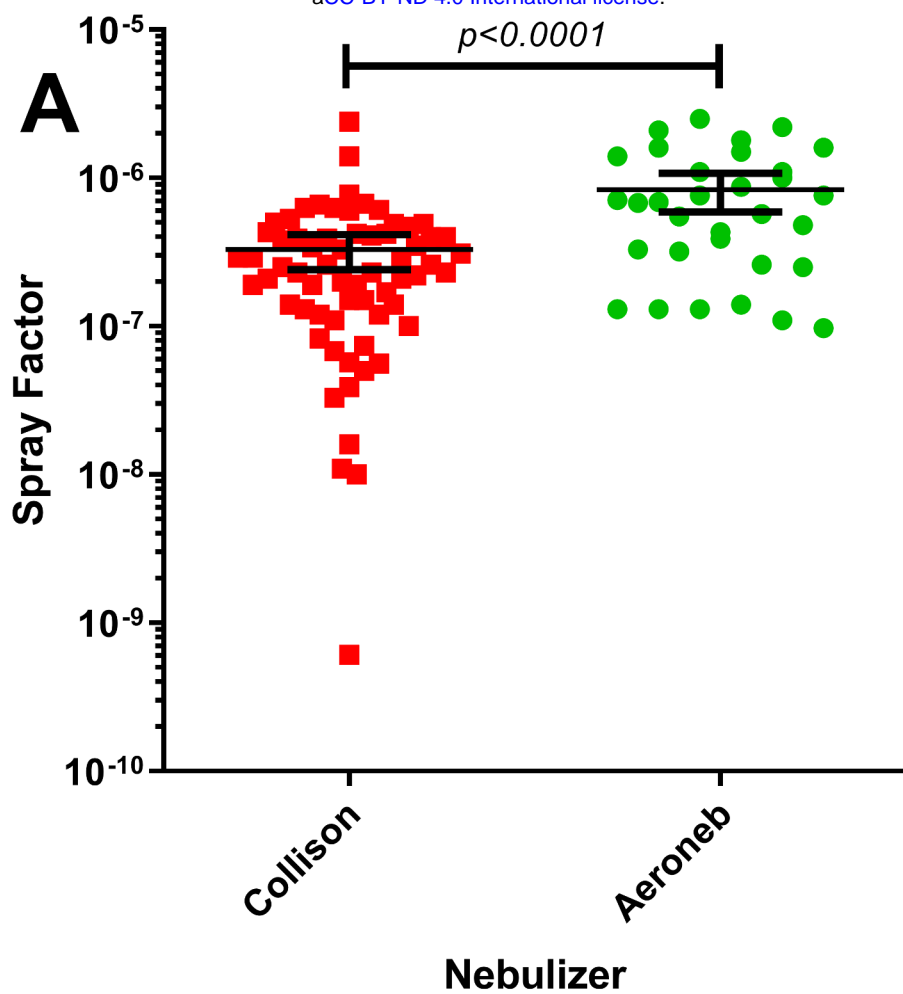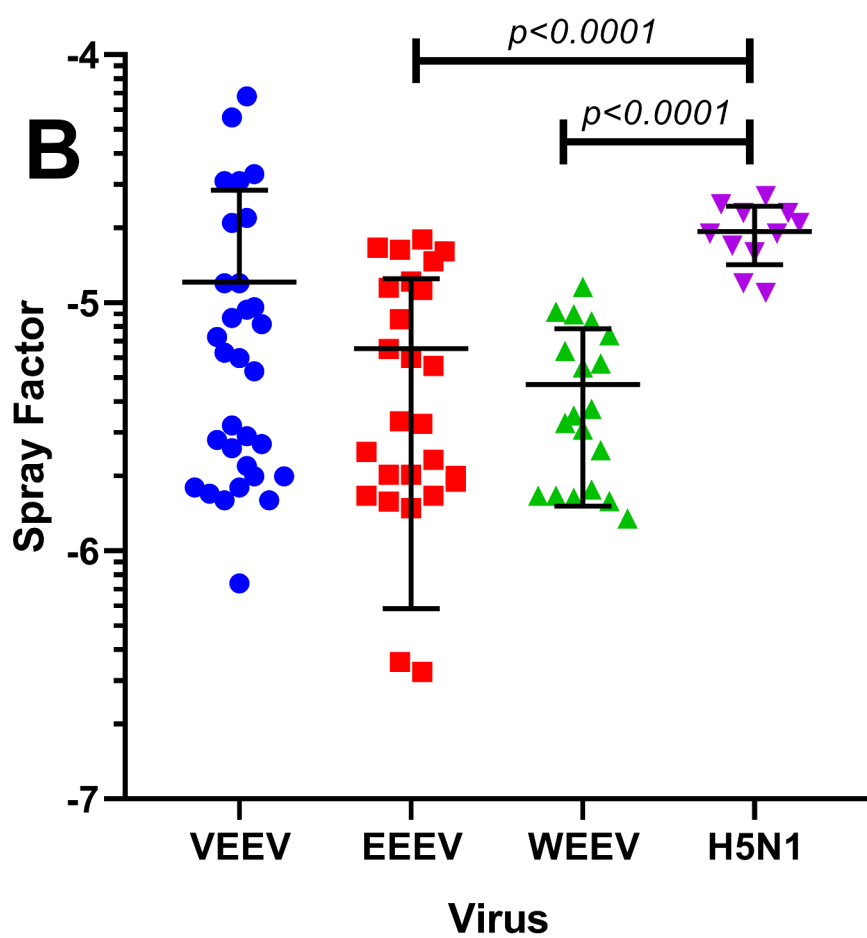

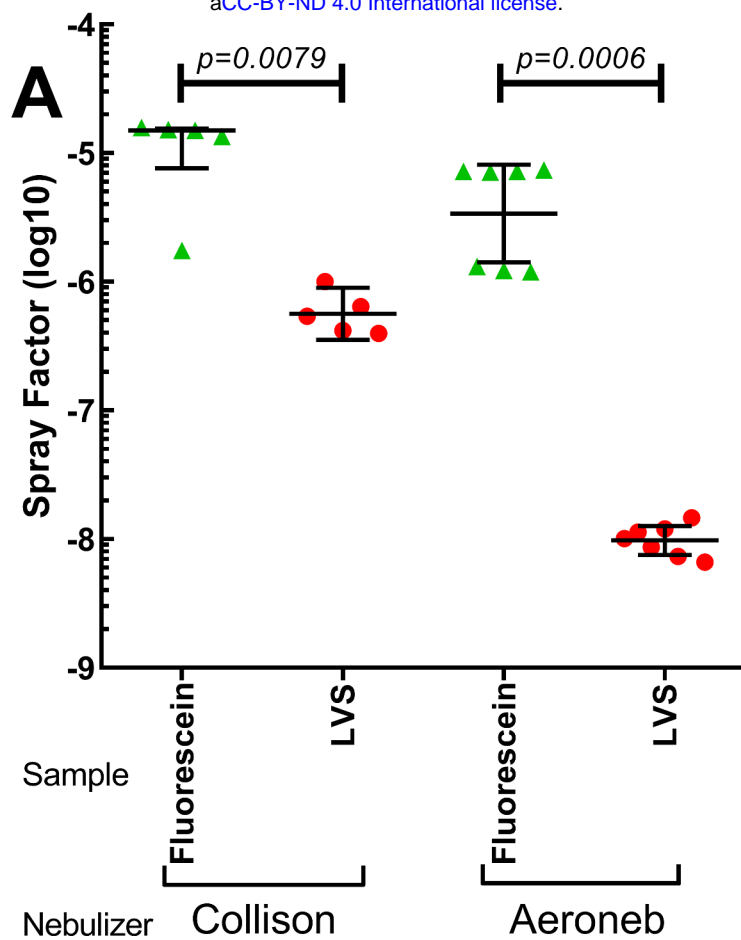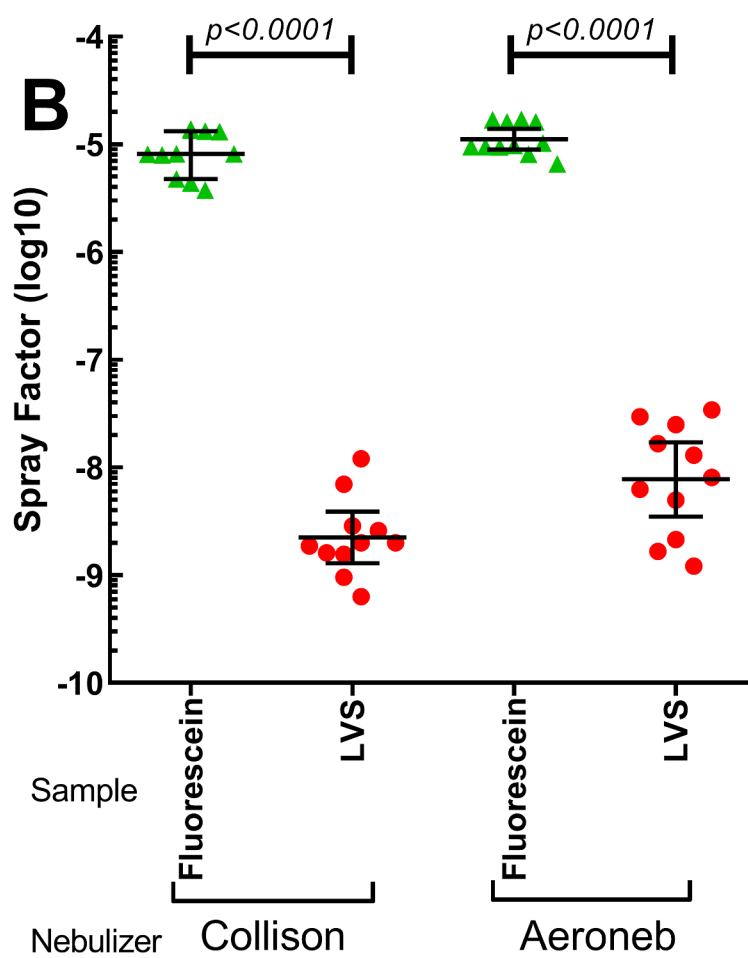

Source: https://www.biorxiv.org/content/10.1101/594358v1.full.pdf
